# Supplementary material for: Submicron-Sized Vermiculite Assisted Oregano Oil for Controlled Release and Long-Term Bacterial Inhibition
Source: MDPI journal article supplement (doi:10.3390/antibiotics10111324), 2021-10-29
Supplement: s1 [file s1]

## Supplementary Materials

### Submicron-Sized Vermiculite Assisted Oregano Oil for Controlled Release and Long-term Bacterial Inhibition

Sukitha Geethma Kothalawala<sup>1</sup>, Jun Zhang<sup>1,\*</sup>, Yue Wang<sup>1</sup>, and Chengzhong Yu<sup>1,2,\*</sup>

<sup>1</sup> Australian Institute of Bioengineering and Nanotechnology, University of Queensland, Brisbane City, QLD, 4072, Australia; s.kothalawala@uq.net.au (S.G.K.); j.zhang11@uq.edu.au (J.Z.); yue.wang1@uq.edu.au (Y.W.)

<sup>2</sup> School of Chemistry and Molecular Engineering, East China Normal University, 200241 Shanghai, China; czyu@chem.ecnu.edu.cn (C.Y.)

\* Correspondence: j.zhang11@uq.edu.au, czyu@chem.ecnu.edu.cn

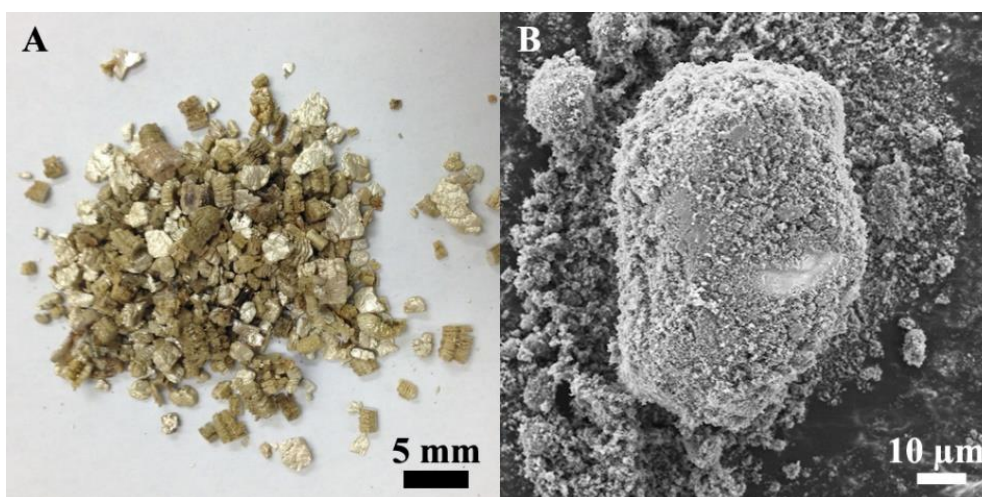

Figure S1. (A) Digital photo of RV, (B) SEM image of pre-milled vermiculite.

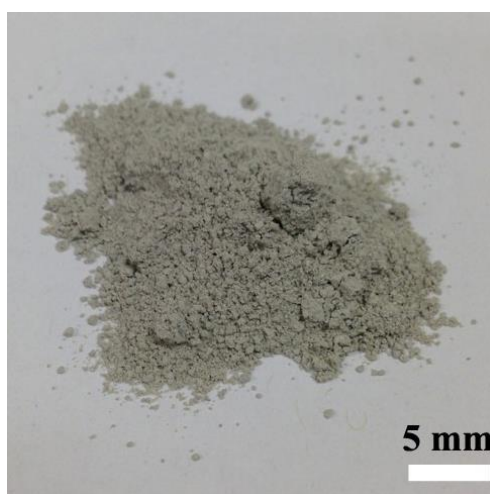

Figure S2. Digital photo of SMV.

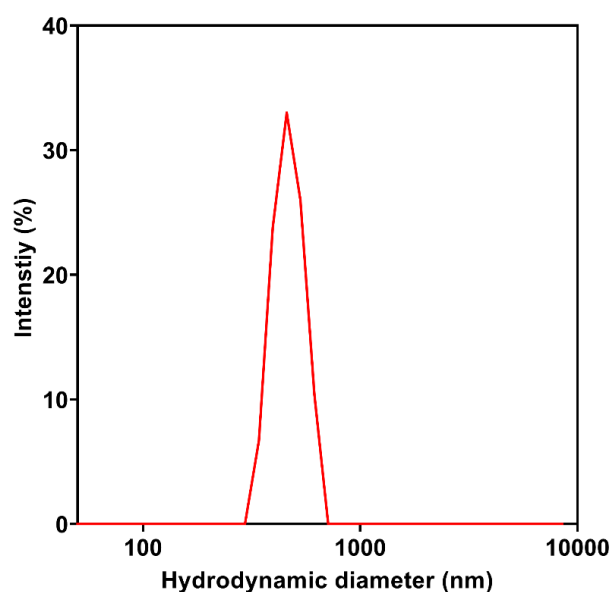

Figure S3. DLS size distribution of SMV in water.

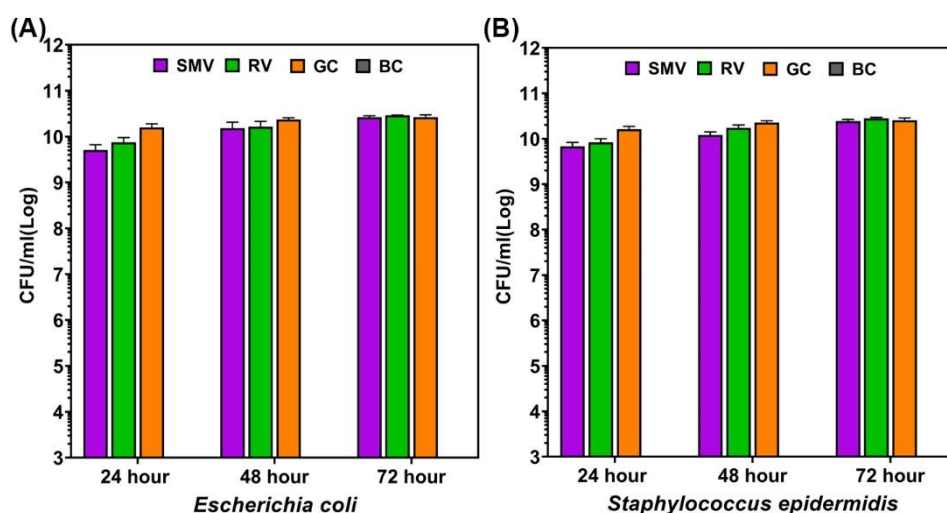

Figure S4. In vitro time-dependent bacterial inhibition test results of SMV and RV towards (A) *E. coli* (B) *S. epidermidis*.

Table S1. Elemental percentages from EDS analysis of SMV

| Element | Atomic number | Mass percentage (%) | Atom percentage (%) | Absolute percentage error (%) |
|---------|---------------|---------------------|---------------------|-------------------------------|
| K       | 19            | 2.94                | 1.63                | 0.13                          |
| Fe      | 26            | 4.63                | 1.79                | 0.18                          |
| Al      | 13            | 2.01                | 1.61                | 0.10                          |
| Si      | 14            | 40.20               | 30.98               | 0.20                          |
| Mg      | 12            | 7.50                | 6.68                | 0.26                          |
| Ti      | 22            | 0.53                | 0.24                | 0.05                          |
| O       | 8             | 42.19               | 5.07                | 1.34                          |
